# Supplementary material for: Formation of high aspect ratio wrinkles and ridges on elastic bilayers with small thickness contrast
Source: Royal Society of Chemistry journal article supplement (doi:10.1039/c8sm01345d), 2018-01-01
Supplement: c8sm01345d1.pdf [file c8sm01345d1.pdf]

## Supporting Information

### Formation of high aspect ratio wrinkles and ridges on elastic bilayers with small thickness

#### contrast

Anesia Auguste<sup>1</sup>, Jiawei Yang<sup>2</sup>, Lihua Jin<sup>2</sup>, Dayong Chen<sup>1</sup>, Zhigang Suo<sup>2</sup>, and Ryan C. Hayward<sup>1</sup>

1 Department of Polymer Science & Engineering, University of Massachusetts, Amherst, MA, 01003, USA. \*E-mail: hayward@umass.edu

2 School of Engineering and Applied Sciences, Kavli Institute for Nanobio Science and Technology, Harvard University, Cambridge, MA, 02138, USA. \*E-mail: [suo@seas.harvard.edu](mailto:suo@seas.harvard.edu)

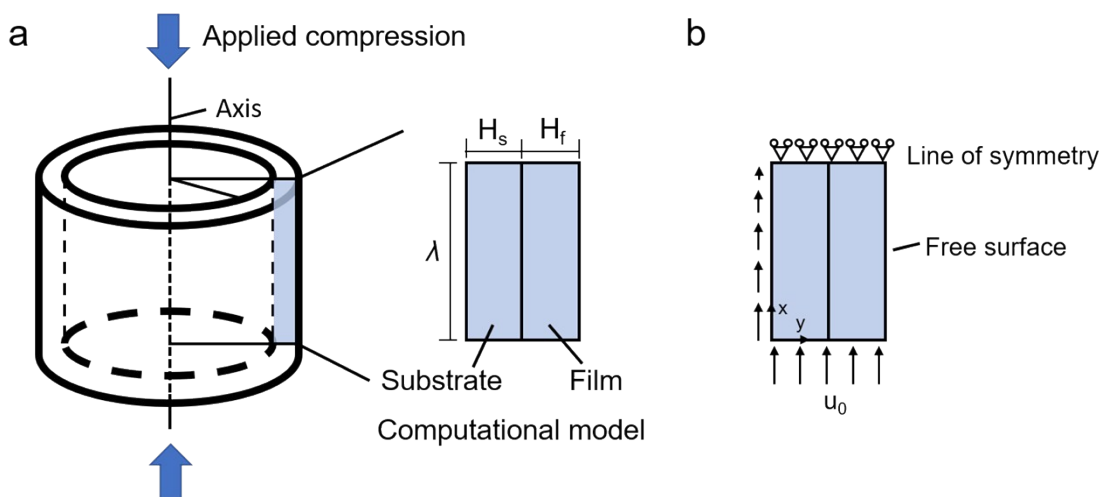

**Figure S1.** A schematic illustration of the computational model. (a) A thin-wall cylinder is used to model the uniaxial compression. The computational cell is axisymmetric, with an axial length of one wrinkle wavelength. (b) The loading condition of the computational cell. The top boundary is a line of symmetry; the bottom boundary is subjected to an applied displacement  $u_0$ ; the left boundary is enforced to have uniform horizontal displacement and vertical displacement of  $u_0 x / \lambda$ ; the right surface is a free surface.

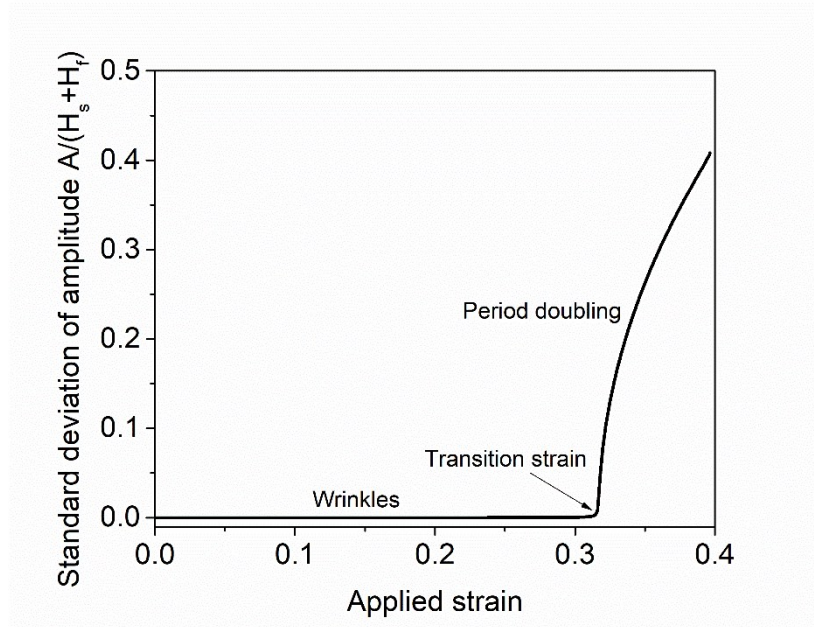

**Figure S2.** An example showing the determination of the critical strain for secondary bifurcation from simulations. The amplitudes of multiple features are measured at a particular strain and normalized with respect to thickness. The standard deviation of these features is then plotted as a function of applied strain. In the wrinkled state, the amplitudes are very uniform and therefore the standard deviation is close to zero. Upon secondary bifurcation, the wrinkle amplitudes lose their uniformity, leading to a sharp increase in the standard deviation. The point where the standard deviation sharply increases is defined as the critical strain for secondary bifurcation.
